# Supplementary material for: In Vitro 3D Spheroid Culture System Displays Sustained T Cell-dependent CLL Proliferation and Survival
Source: PubMed Central journal article supplement (PMC10448932; doi:10.1097/hs9.0000000000000938), 2023-08-23
Supplement: hs9-7-e938-s001.pdf [file hs9-7-e938-s001.pdf]

| sample ID  | experiment                          | sample date | age | gender | IgHV mutation status | treatment                                                   | article figure    |
|------------|-------------------------------------|-------------|-----|--------|----------------------|-------------------------------------------------------------|-------------------|
| H1580001T1 | Biobank (PB)                        | 30-12-2020  | 74  | M      | unknown              | none                                                        | 1A-B              |
| H1580001T1 | Biobank (LN)                        | 30-12-2020  | 74  | M      | unknown              | none                                                        | 1A-B              |
| H1580002T1 | Biobank (PB)                        | 4-1-2021    | 52  | M      | unknown              | none                                                        | 1A-B              |
| H1580002T1 | Biobank (LN)                        | 4-1-2021    | 52  | M      | unknown              | none                                                        | 1A-B              |
| H1580004T1 | Biobank (PB)                        | 18-1-2021   | 59  | M      | unknown              | none                                                        | 1A-B              |
| H1580004T1 | Biobank (LN)                        | 18-1-2021   | 59  | M      | unknown              | none                                                        | 1A-B              |
| H1580005T1 | Biobank (PB)                        | 19-1-2021   | 72  | M      | unknown              | none                                                        | 1A-B              |
| H1580005T1 | Biobank (LN)                        | 19-1-2021   | 72  | M      | unknown              | none                                                        | 1A-B              |
| H1580006T1 | Biobank (PB)                        | 19-1-2021   | 74  | F      | unknown              | none                                                        | 1A-B              |
| H1580006T1 | Biobank (LN)                        | 19-1-2021   | 74  | F      | unknown              | none                                                        | 1A-B              |
| H1580009T1 | Biobank (PB)                        | 27-1-2021   | 60  | M      | unknown              | none                                                        | 1A-B              |
| H1580009T1 | Biobank (LN)                        | 27-1-2021   | 60  | M      | unknown              | none                                                        | 1A-B              |
| H1580010T1 | Biobank (PB)                        | 3-2-2021    | 64  | M      | unknown              | none                                                        | 1A-B              |
| H1580010T1 | Biobank (LN)                        | 3-2-2021    | 64  | M      | unknown              | none                                                        | 1A-B              |
| H1580011T1 | Biobank (PB)                        | 8-2-2021    | 70  | M      | unknown              | none                                                        | 1A-B              |
| H1580011T1 | Biobank (LN)                        | 8-2-2021    | 70  | M      | unknown              | none                                                        | 1A-B              |
| H1580016T1 | Biobank (PB)                        | 2-3-2021    | 82  | M      | unknown              | none                                                        | 1A-B              |
| H1580016T1 | Biobank (LN)                        | 2-3-2021    | 82  | M      | unknown              | none                                                        | 1A-B              |
| H1580018T1 | Biobank (PB)                        | 23-2-2021   | 71  | M      | unknown              | none                                                        | 1A-B              |
| H1580018T1 | Biobank (LN)                        | 23-2-2021   | 71  | M      | unknown              | none                                                        | 1A-B              |
| H1580019T1 | Biobank (PB)                        | 24-2-2021   | 35  | M      | unknown              | none                                                        | 1A-B              |
| H1580019T1 | Biobank (LN)                        | 24-2-2021   | 35  | M      | unknown              | none                                                        | 1A-B              |
| H1580021T1 | Biobank (PB)                        | 25-2-2021   | 66  | M      | unknown              | none                                                        | 1A-B              |
| H1580021T1 | Biobank (LN)                        | 25-2-2021   | 66  | M      | unknown              | none                                                        | 1A-B              |
| H1580023T1 | Biobank (PB)                        | 3-3-2021    | 65  | M      | unknown              | none                                                        | 1A-B              |
| H1580023T1 | Biobank (LN)                        | 3-3-2021    | 65  | M      | unknown              | none                                                        | 1A-B              |
| H1580025T1 | Biobank (PB)                        | 2-3-2021    | 68  | M      | unknown              | none                                                        | 1A-B              |
| H1580025T1 | Biobank (LN)                        | 2-3-2021    | 68  | M      | unknown              | none                                                        | 1A-B              |
| H1580028T1 | Biobank (PB)                        | 16-3-2021   | 60  | F      | unknown              | none                                                        | 1A-B              |
| H1580028T1 | Biobank (LN)                        | 16-3-2021   | 60  | F      | unknown              | none                                                        | 1A-B              |
| H1580029T1 | Biobank (PB)                        | 9-3-2021    | 67  | F      | unknown              | none                                                        | 1A-B              |
| H1580029T1 | Biobank (LN)                        | 9-3-2021    | 67  | F      | unknown              | none                                                        | 1A-B              |
| H1580030T1 | Biobank (PB)                        | 15-3-2021   | 66  | F      | unknown              | none                                                        | 1A-B              |
| H1580030T1 | Biobank (LN)                        | 15-3-2021   | 66  | F      | unknown              | none                                                        | 1A-B              |
| H1580031T1 | Biobank (PB)                        | 23-3-2021   | 68  | M      | unknown              | none                                                        | 1A-B              |
| H1580031T1 | Biobank (LN)                        | 23-3-2021   | 68  | M      | unknown              | none                                                        | 1A-B              |
| H1580032T1 | Biobank (PB)                        | 15-3-2021   | 86  | M      | unknown              | none                                                        | 1A-B              |
| H1580032T1 | Biobank (LN)                        | 15-3-2021   | 86  | M      | unknown              | none                                                        | 1A-B              |
| H1580033T1 | Biobank (PB)                        | 16-3-2021   | 56  | F      | unknown              | none                                                        | 1A-B              |
| H1580033T1 | Biobank (LN)                        | 16-3-2021   | 56  | F      | unknown              | none                                                        | 1A-B              |
| H1580034T1 | Biobank (PB)                        | 17-3-2021   | 58  | M      | unknown              | none                                                        | 1A-B              |
| H1580034T1 | Biobank (LN)                        | 17-3-2021   | 58  | M      | unknown              | none                                                        | 1A-B              |
| H1580036T1 | Biobank (PB)                        | 24-3-2021   | 75  | M      | unknown              | none                                                        | 1A-B              |
| H1580036T1 | Biobank (LN)                        | 24-3-2021   | 75  | M      | unknown              | none                                                        | 1A-B              |
| H1580038T1 | Biobank (PB)                        | 30-3-2021   | 73  | M      | unknown              | none                                                        | 1A-B              |
| H1580038T1 | Biobank (LN)                        | 30-3-2021   | 73  | M      | unknown              | none                                                        | 1A-B              |
| H1580039T1 | Biobank (PB)                        | 30-3-2021   | 63  | F      | unknown              | none                                                        | 1A-B              |
| H1580039T1 | Biobank (LN)                        | 30-3-2021   | 63  | F      | unknown              | none                                                        | 1A-B              |
| 2967       | Confocal staining                   | 6-4-2020    | 69  | F      | unknown              | none                                                        | 1C                |
| 2367       | Immunophenotyping                   | 18-9-2018   | 68  | F      | unknown              | none                                                        | 1D                |
| 2549       | Immunophenotyping                   | 23-4-2019   | 77  | M      | unknown              | none                                                        | 1D                |
| 3067       | Immunophenotyping                   | 26-6-2020   | 60  | F      | unknown              | none                                                        | 1D                |
| 2218       | Immunophenotyping                   | 15-5-2018   | 51  | M      | unknown              | none                                                        | 1D                |
| 2973       | Immunophenotyping                   | 14-4-2020   | 70  | M      | unknown              | none                                                        | 1D                |
| 3065       | Immunophenotyping                   | 24-6-2020   | 62  | F      | unknown              | none                                                        | 1D                |
| 3236       | Immunophenotyping                   | 26-10-2020  | 70  | F      | unknown              | none                                                        | 1D                |
| 2244       | Immunophenotyping                   | 5-6-2018    | 49  | M      | unknown              | none                                                        | 1D                |
| 1093       | CLL/T cell activation/proliferation | 5-9-2011    | 53  | M      | mutated              | none                                                        | 2A-C, 2E-F, S2A-D |
| 1448       | CLL/T cell activation/proliferation | 6-2-2014    | 63  | M      | mutated              | none                                                        | 2A-C, 2E-F, S2A-D |
| 1093       | CLL/T cell activation/proliferation | 5-9-2011    | 53  | M      | mutated              | none                                                        | 2A-C, 2E-F, S2A-D |
| 1201       | CLL/T cell activation/proliferation | 11-5-2012   | 61  | F      | unknown              | none                                                        | 2A-C, 2E-F, S2A-D |
| 1093       | CLL/T cell activation/proliferation | 5-9-2011    | 53  | M      | mutated              | none                                                        | 2A-F, S2A-E       |
| 1201       | CLL/T cell activation/proliferation | 11-5-2012   | 61  | F      | unknown              | none                                                        | 2A-C, 2E-F, S2A-D |
| 1201       | CLL/T cell activation/proliferation | 11-5-2012   | 61  | F      | unknown              | none                                                        | 2A-C, 2E-F, S2A-D |
| 1239       | CLL/T cell activation/proliferation | 24-7-2012   | 71  | F      | unmutated            | none                                                        | 2A-C, 2E-F, S2A-D |
| 1201       | CLL/T cell activation/proliferation | 11-5-2012   | 61  | F      | unknown              | none                                                        | 2A-C, 2E-F, S2A-D |
| 1239       | CLL/T cell activation/proliferation | 24-7-2012   | 71  | F      | unmutated            | none                                                        | 2A-C, 2E-F, S2A-D |
| 333        | Long-term proliferation cultures    | 24-5-2002   | 86  | F      | unmutated            | none                                                        | 3A-B              |
| 1201       | Long-term proliferation cultures    | 11-5-2012   | 61  | F      | unknown              | none                                                        | 3A                |
| 2089       | Long-term proliferation cultures    | 16-1-2018   | 65  | F      | unknown              | none                                                        | 3A, 3D            |
| 1448       | Long-term proliferation cultures    | 6-2-2014    | 63  | M      | mutated              | none                                                        | 3A                |
| 361        | Long-term proliferation cultures    | 29-8-2000   | 69  | M      | unmutated            | chlorambucil, 2x<br>fludarabine,<br>CHOP+R,<br>radiotherapy | 3A                |
| 2089       | Long-term proliferation cultures    | 16-1-2018   | 65  | F      | unknown              | none                                                        | 3A                |
| 885        | Long-term proliferation cultures    | 7-1-2010    | 92  | F      | mutated              | none                                                        | 3C                |
| 273        | Acalabrutinib proliferation assay   | 29-6-2006   | 77  | M      | mutated              | none                                                        | 4A, S4A-C         |

|          |                                   |            |    |   |            |                                                                                |             |
|----------|-----------------------------------|------------|----|---|------------|--------------------------------------------------------------------------------|-------------|
| 1065     | Acalabrutinib proliferation assay | 8-6-2011   | 73 | M | mutated    | none                                                                           | 4A-B, S4A-C |
| 1065     | Acalabrutinib proliferation assay | 8-6-2011   | 73 | M | mutated    | none                                                                           | 4A-C, S4C   |
| 2791     | Acalabrutinib proliferation assay | 11-12-2019 | 55 | M | unknown    | none                                                                           | 4B, S4B-C   |
| 3194     | Acalabrutinib proliferation assay | 21-9-2020  | 62 | M | mutated    | FCR                                                                            | 4B, S4B-C   |
| 222      | Acalabrutinib proliferation assay | 28-2-2006  | 54 | M | polyclonal | none                                                                           | 4B          |
| 1401     | Acalabrutinib proliferation assay | 24-9-2013  | 78 | M | unmutated  | none                                                                           | 4B          |
| 273      | Cohesion analysis                 | 29-6-2006  | 77 | M | mutated    | none                                                                           | 4E          |
| 1065     | Cohesion analysis                 | 8-6-2011   | 73 | M | mutated    | none                                                                           | 4E          |
| 2791     | Cohesion analysis                 | 11-12-2019 | 55 | M | unknown    | none                                                                           | 4D-E        |
| 1546     | Refractory ibrutinib sample       | 24-9-2014  | 50 | M | unmutated  | FCR                                                                            | 5A          |
| 3104     | Refractory ibrutinib sample       | 21-7-2020  | 56 | M | unmutated  | FCR, ibrutinib                                                                 | 5A          |
| EE5.1    | Refractory ibrutinib sample       | 6-9-2012   | 66 | ? | unknown    | none                                                                           | 5A          |
| EE5.3    | Refractory ibrutinib sample       | 30-7-2015  | 69 | ? | unknown    | ibrutinib                                                                      | 5A          |
| 197      | Venetoclax sensitivity            | 15-12-2005 | 60 | M | unmutated  | 2x chloorambucil,<br>radiotherapy,<br>fludarabine                              | 5B, S3B     |
| 1557     | Venetoclax sensitivity            | 17-10-2014 | 64 | F | mutated    | none                                                                           | 5B, S3B     |
| 1873     | Venetoclax sensitivity            | 16-1-2017  | 54 | F | mutated    | none                                                                           | 5B, S3B     |
| 64       | Intracellular Bcl-2 FACS          | 16-12-2004 | 66 | F | mutated    | none                                                                           | 5C-D        |
| 1085     | Intracellular Bcl-2 FACS          | 9-8-2011   | 70 | M | mutated    | none                                                                           | 5C-D        |
| 2029     | Intracellular Bcl-2 FACS          | 12-9-2017  | 77 | F | mutated    | none                                                                           | 5C-D        |
| 702      | 3D cytotoxicity                   | 16-10-2008 | 64 | F | mutated    | none                                                                           | 5E          |
| 721      | 3D cytotoxicity                   | 18-12-2008 | 85 | M | mutated    | none                                                                           | 5E          |
| 708      | 3D cytotoxicity                   | 13-11-2008 | 68 | F | mutated    | none                                                                           | 5E          |
| 839      | 3D cytotoxicity                   | 9-9-2009   | 71 | F | mutated    | none                                                                           | 5E          |
| 123      | T cell cytotoxicity               | 25-7-2003  | 61 | M | mutated    | none                                                                           | 5F          |
| 1659     | T cell cytotoxicity               | 25-6-2015  | 57 | M | mutated    | none                                                                           | 5F          |
| HD 93    | T cell cytotoxicity               | 1-12-2021  | 63 | M | -          | -                                                                              | 5F          |
| HD 96    | T cell cytotoxicity               | 1-12-2021  | 62 | M | -          | -                                                                              | 5F          |
| 1753     | 2D-3D proliferation optimization  | 21-3-2016  | 62 | F | unmutated  | FCR, chloorambucil                                                             | S1A-C       |
| 1797     | 2D-3D proliferation optimization  | 30-8-2016  | 74 | F | mutated    | none                                                                           | S1A-C       |
| 1439     | 2D-3D proliferation optimization  | 13-1-2014  | 57 | M | mutated    | none                                                                           | S1A-C       |
| 1673     | 2D-3D proliferation optimization  | 3-8-2015   | 40 | M | unmutated  | none                                                                           | S1A-C       |
| 1808     | 2D-3D proliferation optimization  | 12-9-2016  | 46 | M | unmutated  | none                                                                           | S1A-C       |
| 1254     | 2D-3D proliferation optimization  | 11-9-2012  | 62 | F | mutated    | none                                                                           | S1A-C       |
| 1254     | 2D-3D proliferation optimization  | 11-9-2012  | 62 | F | mutated    | none                                                                           | S1A-C       |
| 1857     | 2D-3D proliferation optimization  | 2-1-2017   | 84 | M | unmutated  | none                                                                           | S1A-C       |
| 2038     | 2D-3D proliferation optimization  | 2-10-2017  | 68 | F | mutated    | none                                                                           | S1A-C       |
| 187      | LN stroma proliferation           | 15-11-2005 | 58 | F | mutated    | none                                                                           | S3A         |
| 197      | LN stroma proliferation           | 15-12-2005 | 60 | M | unmutated  | 2x chloorambucil,<br>radiotherapy,<br>fludarabine                              | S3A         |
| 1673     | LN stroma proliferation           | 3-8-2015   | 40 | M | unmutated  | none                                                                           | S3A         |
| H141-009 | Acalabrutinib proliferation assay | 4-9-2017   | 52 | F | mutated    | chloorambucil,<br>ofatumumab                                                   | S4A         |
| 267      | Acalabrutinib proliferation assay | 19-6-2006  | 61 | M | unmutated  | 2x chloorambucil,<br>radiotherapy,<br>fludarabine                              | S4A         |
| 667      | Acalabrutinib proliferation assay | 20-6-2008  | 54 | M | unmutated  | 2x chloorambucil +<br>rituximab,<br>chloorambucil,<br>ibrutinib,<br>ofatumumab | S4A         |
| 667      | Acalabrutinib proliferation assay | 20-6-2008  | 54 | M | unmutated  | 2x chloorambucil +<br>rituximab,<br>chloorambucil,<br>ibrutinib,<br>ofatumumab | S4A         |
| 247      | Acalabrutinib proliferation assay | 2-5-2006   | 27 | F | unmutated  | fludarabine, FC +<br>alemtuzumab                                               | S4A         |
| 1546     | Acalabrutinib proliferation assay | 24-9-2014  | 50 | M | unmutated  | FCR, ibrutinib,<br>venetoclax                                                  | S4A         |
| 64       | Acalabrutinib proliferation assay | 16-12-2004 | 66 | F | mutated    | none                                                                           | S4A         |
