# Supplementary material for: In Vitro 3D Spheroid Culture System Displays Sustained T Cell-dependent CLL Proliferation and Survival
Source: PubMed Central journal article supplement (PMC10448932; doi:10.1097/hs9.0000000000000938), 2023-08-23
Supplement: hs9-7-e938-s003.pdf [file hs9-7-e938-s003.pdf]

# Supplemental Figure 1.

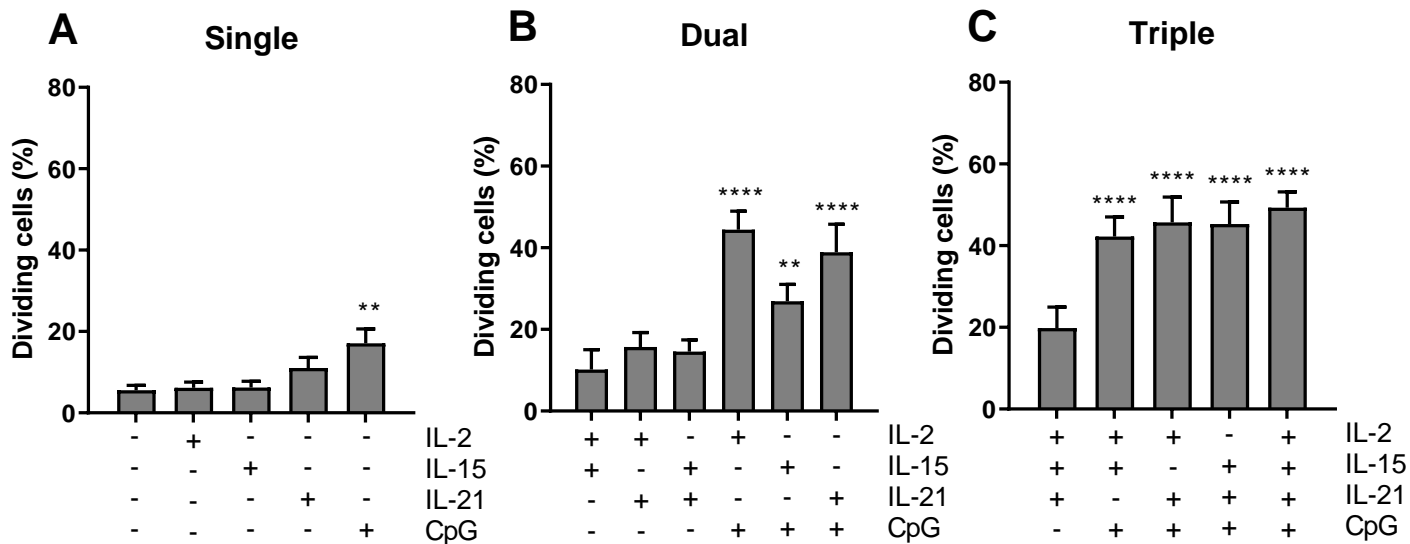

**Supplemental Figure 1. CLL proliferation cocktail optimization. A-C)** CFSE-labeled CLL cells were stimulated as indicated and cultured in 3D spheroid cultures for 1 week. Afterwards, cells were measured using flow cytometry and the percentage of dividing cells was quantified. **(A)** Results of single cytokine or CpG stimulation. **(B)** Results of dual cytokine stimulation or single cytokine stimulation in combination with CpG. **(C)** Results of dual and triple cytokine stimulation in combination with CpG. Bars represent the mean  $\pm$  SEM ( $n = 9$ ), \*\* $p < 0.01$ , \*\*\*\* $p < 0.0001$  (paired t-test). Each group was compared with the unstimulated control group.

# Supplemental Figure 2.

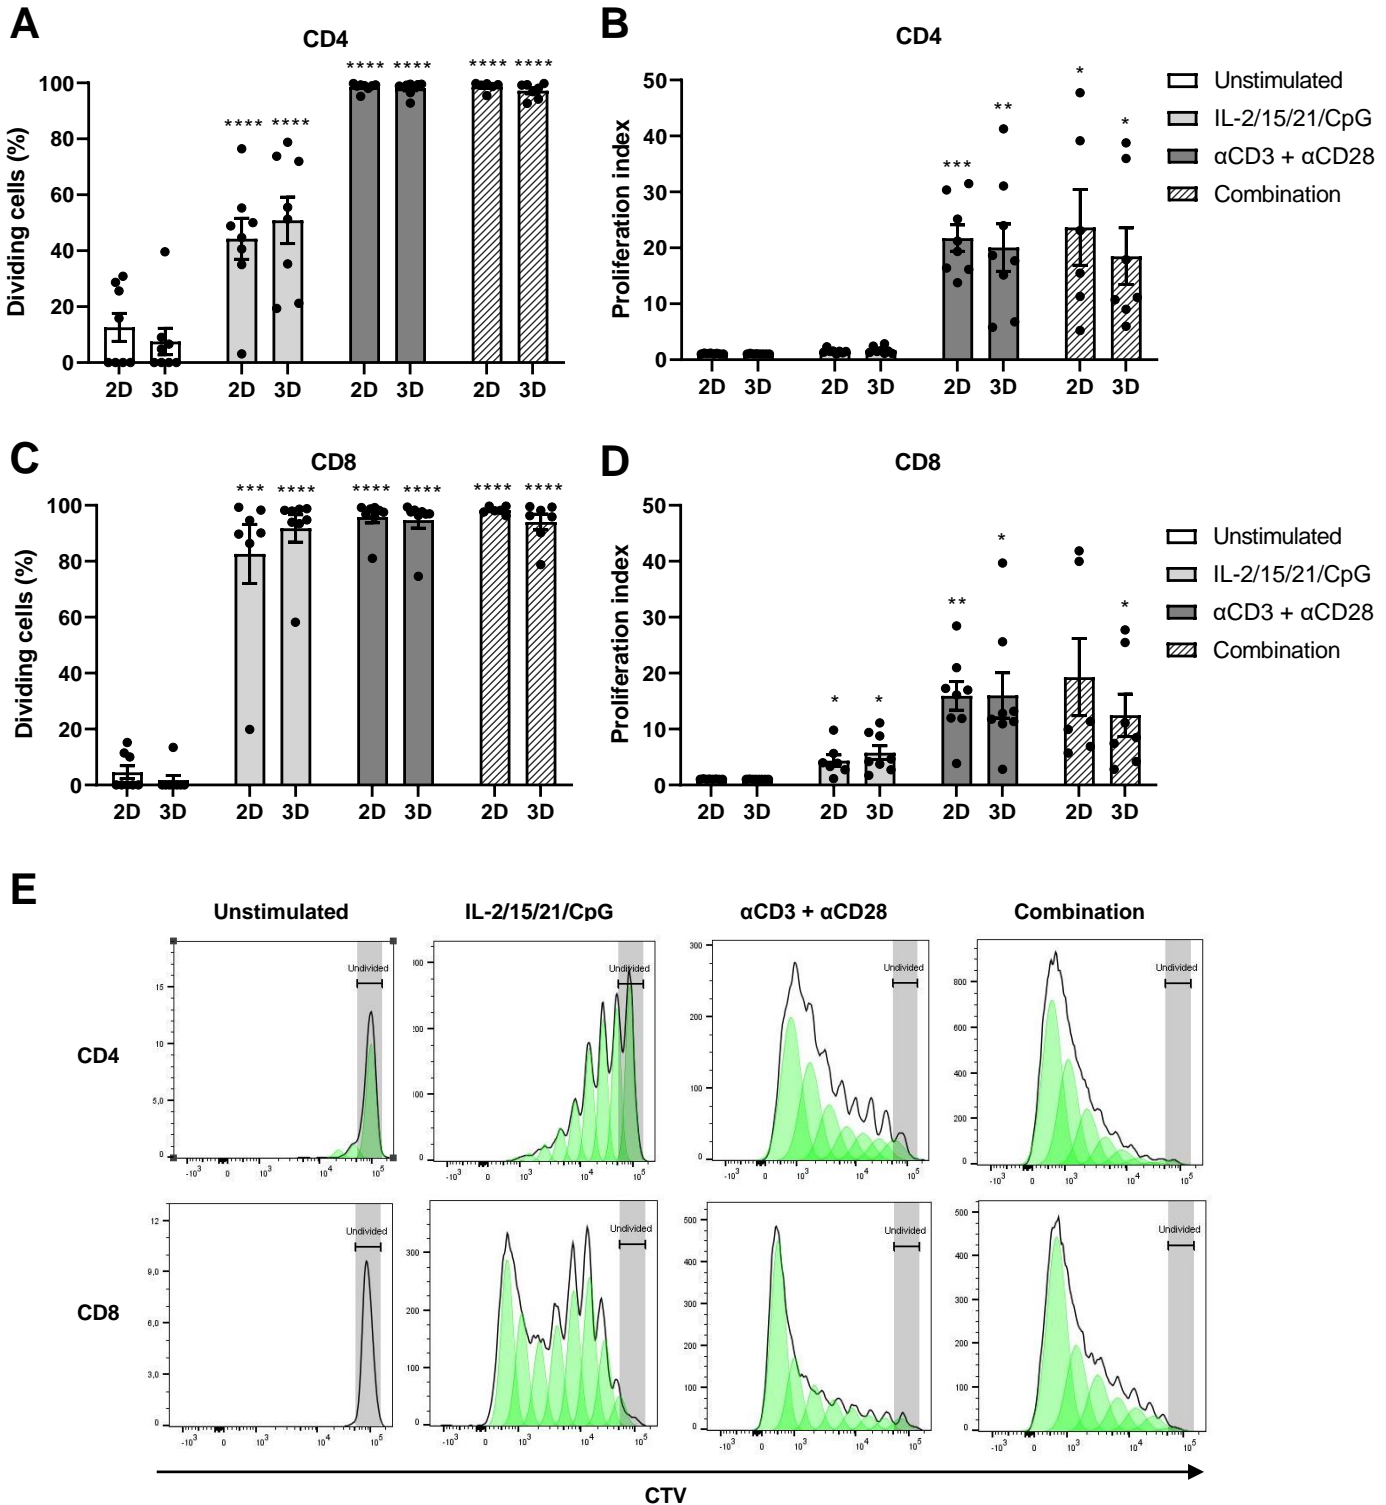

**Supplemental Figure 2. Overview of T cell proliferation data. A-D)** CTV-labeled CLL samples were stimulated as indicated and cultured in standard round-bottom 96 well plates (2D) or ULA plates (3D) for 8 days. Afterwards, cells were measured using flow cytometry, and both the percentage of dividing cells (**A**, **C**) and the proliferation index were quantified (**B**, **D**, **E**) for both CD4+ and CD8+ T cells. Bars represent the mean  $\pm$  SEM ( $n = 10$ ), \* $p < 0.05$ , \*\* $p < 0.01$ , \*\*\* $p < 0.001$ , \*\*\*\* $p < 0.0001$  (two-way ANOVA). Each group was compared with the unstimulated control group.

# Supplemental Figure 3.

## A

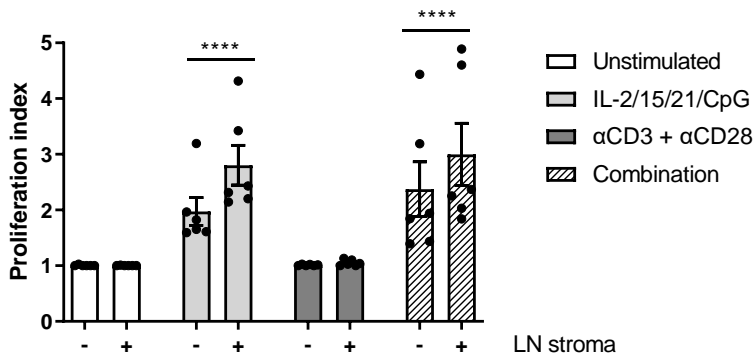

## B

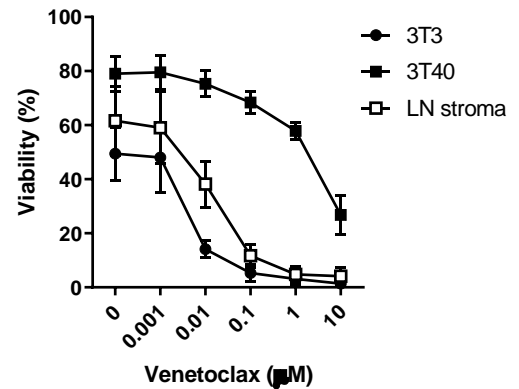

**Supplemental Figure 3. Addition of lymph node stroma promotes CLL proliferation. A)** CTV-labeled CLL cells were stimulated as indicated and/or cocultured with primary LN fibroblasts in 3D spheroid cultures for 1 week. Afterwards, cells were measured using flow cytometry, and the proliferation index of the CD5+CD19+ CLL population was quantified. Error bars represent the mean  $\pm$  SEM (n = 6), \*p < 0.05 (two-way repeated measures ANOVA). **B)** CTV-labeled CLL cells were cocultured with either 3T3, 3T40 or primary LN fibroblasts in 3D spheroid cultures for 1 week. Afterwards, cells were incubated with a titration of 0.001-10  $\mu$ M venetoclax for an additional 24 hours. Viability was measured by flow cytometry using DiOC6 and TO-PRO-3 viability dyes. Error bars represent the mean  $\pm$  SEM (n = 3).

# Supplemental Figure 4.

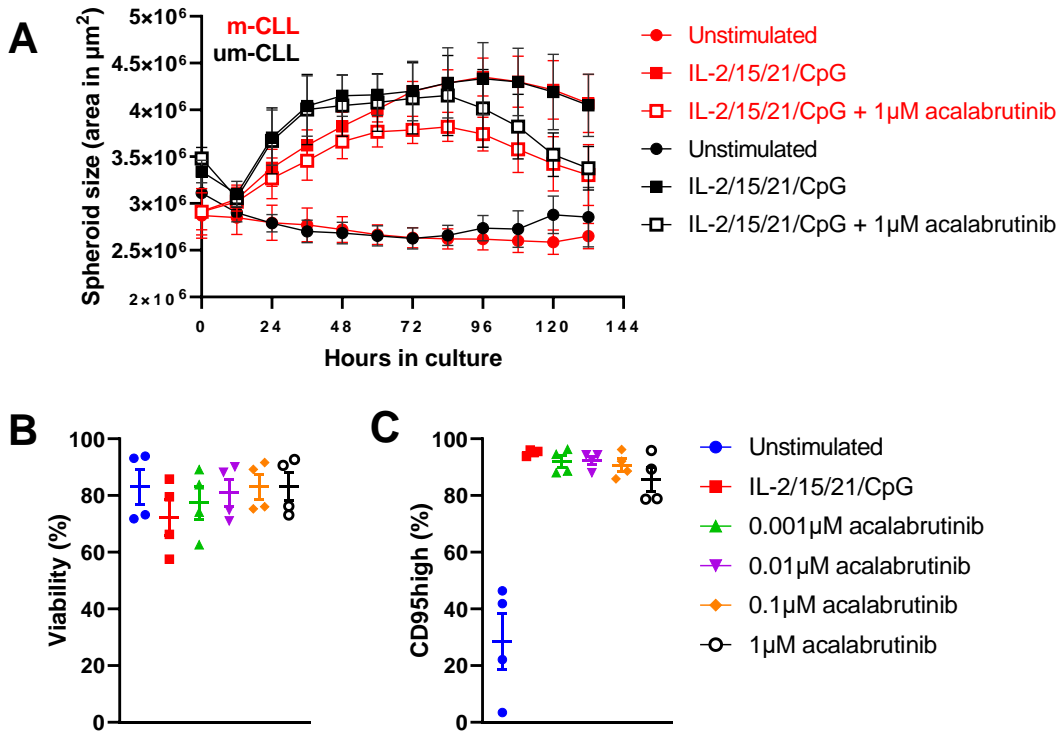

**Supplemental Figure 4. CLL cell viability and activation upon in vitro acalabrutinib treatment. A)** Spheroids of both unmutated IGHV ( $n = 5$ ) and mutated IGHV ( $n = 5$ ) CLL samples were cultured as indicated. Culture plates were placed in an IncuCyte live-cell imager which imaged and quantified the spheroid area every 12 hours. **B-C)** CTV-labeled CLL samples were stimulated with IL-2/15/21/CpG and cultured in ULA plates (3D) for 6 days in the presence of acalabrutinib. Error bars represent the mean  $\pm$  SEM ( $n = 4$ ). Afterwards, cells were measured using flow cytometry and the viability (**B**) and activation of the CD5+CD19+ CLL population based on CD95 expression were quantified (**C**). These results are supplementary to the results shown in Figure 4A-B.
